# Supplementary material for: Insights into Healthcare Professionals’ Perceptions and Attitudes toward Nanotechnological Device Application: What Is the Current Situation in Glioblastoma Research?
Source: MDPI journal article supplement (doi:10.3390/biomedicines11071854), 2023-06-28
Supplement: s1 [file s1]

**Table S1.** Data extraction form

| Article | First author | Year | Country | Study design | Recruitment setting | Sample size | Age | Profile | Prior experience or education with nanomaterials (%) | Type of measure | Nr of items | Theoretic framework | Statistical analysis | Aim of the study |
|---------|--------------|------|---------|--------------|---------------------|-------------|-----|---------|------------------------------------------------------|-----------------|-------------|---------------------|----------------------|------------------|
|---------|--------------|------|---------|--------------|---------------------|-------------|-----|---------|------------------------------------------------------|-----------------|-------------|---------------------|----------------------|------------------|

**Article** = article title

**First Author** = first author surname

**Year** = year of publication

**Country** = country where the study was conducted

**Study design** = study design

**Recruitment setting** = setting where participants were recruited (e.g. private/public hospital, university)

**Sample size** = participants sample size

**Age** = participants' mean age

**Profile** = participants' job profile (e.g. doctor – including field of specialization - , student, medical resident)

**Prior experience or education with nanomaterials** = percentage of responders reporting prior experience/education with nanomaterials

**Type of measure** = type of assessment measure (e.g. self-report)

**Nr of items** = number of items of the assessment instruments used to collect data

**Theoretic framework** = measures' reference model/theory

**Statistical analysis** = type of data analysis (e.g. descriptive, predictive, inferential)

**Aim of the study** = aim of the study

**Table S2.** Keyword included in the search query.

| <i>First keyword</i>              | <i>Second Keyword</i> | <i>Third Keyword</i> |
|-----------------------------------|-----------------------|----------------------|
| Nanotechnolog*[Title/Abstract] OR | Physicians OR         | Perception OR        |
| nanomedicine[Title/Abstract] OR   | Medical Residents OR  | Attitude OR          |
| Nanomedicine[Mesh] OR             | Clinicians            | Acceptance OR        |
| Nanotechnology[Mesh]              |                       | Knowledge            |
